# 1 **Dynamic neurotransmitter specific transcription factor expression profiles during** 2 ***Drosophila* development**

3  
4 Alicia Estacio-Gómez, Amira Hassan, Emma Walmsley, Lily Lee and Tony D. Southall\*

5 Department of Life Sciences, Imperial College London, Sir Ernst Chain Building, London, UK

6 \*Correspondence to [t.southall@imperial.ac.uk](mailto:t.southall@imperial.ac.uk)  
7

## 8 **Abstract**

9 The remarkable diversity of neurons in the nervous system is generated during development, when  
10 properties such as cell morphology, receptor profiles and neurotransmitter identities are specified.  
11 Neurotransmitters are essential for neuronal communication, and transcription factors are the key  
12 determinants of neurotransmitter fate. In order to gain a greater understanding of neurotransmitter  
13 specification we profiled the transcription state of cholinergic, GABAergic and glutamatergic neurons  
14 *in vivo* at multiple developmental time points. We identified 86 differentially expressed transcription  
15 factors that are uniquely enriched, or uniquely depleted, in a specific neurotransmitter subtype. Some  
16 transcription factors show a similar profile across development, others only show enrichment or  
17 depletion at specific developmental stages. Profiling of *acj6* (cholinergic enriched) and *Ets65A*  
18 (cholinergic depleted) binding sites *in vivo* reveals that they both directly bind the *Chat* locus, in  
19 addition to a wide spectrum of other key neuronal differentiation genes. Our data underlines that,  
20 similar to *C. elegans*, there are no simple transcription factor codes for neurotransmitter type  
21 specification, and provides a useful resource for studying the developmental basis of neurotransmitter  
22 specification in *Drosophila* and other model systems.

## 23 **Introduction**

24 The human brain is perhaps the most complex system known to mankind. It consists of approximately  
25 85 billion neurons, which possess very diverse morphologies, neurotransmitter identities, electrical  
26 properties and preferences for synaptic partners. Understanding how this diversity is generated is one  
27 of the greatest challenges in biology and can only be achieved by identifying the underlying molecular  
28 mechanisms that determine these neuronal properties. Neurotransmitters allow neurons to  
29 communicate with each other, enabling organisms to sense, interpret and interact with their  
30 environment. Fast-acting neurotransmitters include acetylcholine and glutamate, which are, in  
31 general, excitatory, and GABA, which is inhibitory. The function of individual neurons depends on the  
32 specific types of neurotransmitters they produce, which in turn ensures proper information flow and  
33 can also influence the formation of neural circuits (Andreae and Burrone, 2018). Therefore the proper  
34 specification of neurotransmitter fate is fundamental for nervous system development.

35 Model organism studies in *C. elegans*, mice and *Drosophila* have provided a wealth of information  
36 about factors and mechanisms involved in neurotransmitter specification. Comprehensive  
37 neurotransmitter maps (Hobert, 2016) and the description of terminal selector genes in *C. elegans*  
38 (Hobert, 2008) have provided important contributions to the field. These terminal selectors are  
39 transcription factors (or a transcription factor complex) that regulate the expression of a battery of  
40 terminal differentiation genes in the last phase of neuronal differentiation, and maintain the  
41 expression of these genes during the lifetime of a neuron (Hobert, 2008). For example, the *C. elegans*  
42 transcription factors *ttx-3* and *unc-86* act as terminal selectors in distinct cholinergic and serotonergic  
43 neuron populations, respectively (Zhang et al., 2014).

44 Cellular context is important for the action of these specifying factors, as misexpression of terminal  
45 selectors in other neuronal subtypes is often not sufficient to reprogram their fate (Duggan et al.,  
46 1998; Wenick and Hobert, 2004). The presence of co-factors, and likely the chromatin state, can also  
47 influence this plasticity (Altun-Gultekin et al., 2001; Patel and Hobert, 2017). Related to this, there  
48 appears to be little evidence for master regulators of cholinergic, GABAergic or glutamatergic fate  
49 (Konstantinides et al., 2018; Lacin et al., 2019; Serrano-Saiz et al., 2013). Rather, individual lineages, or  
50 subpopulations, utilise different transcription factors (or combinations of transcription factors) to  
51 specify the fast-acting neurotransmitter that they will utilise. Developmental context also plays a role  
52 in the mechanisms governing neurotransmitter specification. In *Drosophila*, early born embryonic  
53 neurons in a given lineage can use different neurotransmitters (Landgraf et al., 1997; Schmid et al.,  
54 1999). However, strikingly, each post-embryonic lineage only uses one neurotransmitter (Lacin et al.,  
55 2019), implying that specification occurs at the stem cell level during larval stages.

56 Neurotransmitter specification studies across different organisms have highlighted conserved  
57 mechanisms. A prominent example is the binding of the transcription factors AST-1 (*C. elegans*) and  
58 Etv1 (vertebrates) to a phylogenetically conserved DNA motif to specify dopaminergic fate (Flames  
59 and Hobert, 2009). Furthermore, orthologues *acj6* (*Drosophila*), *unc-86* (*C. elegans*) and  
60 *Brn3A/POU4F1* (vertebrates) all have roles in cholinergic specification (Lee and Salvaterra, 2002;  
61 Serrano-Saiz et al., 2018; Zhang et al., 2014), while *PITX2* (vertebrates) and *unc-30* (*C. elegans*) both  
62 control GABAergic differentiation (Jin et al., 1994; Waite et al., 2011; Westmoreland et al., 2001).

63 In order to identify novel candidate genes, and investigate the dynamics of neurotransmitter specific  
64 transcription factors throughout development, we have performed cell specific profiling of RNA  
65 polymerase II occupancy, *in vivo*, in cholinergic, GABAergic and glutamatergic neurons of *Drosophila*.  
66 We identify 86 transcription factors that show differential expression between neurotransmitter  
67 subtypes, in at least one developmental time point. There are both uniquely enriched and uniquely  
68 depleted transcription factors, and we show that *acj6* (cholinergic enriched) and *Ets65A* (cholinergic  
69 depleted) both directly bind the choline acetyltransferase gene (*ChAT*) required for cholinergic fate.

70

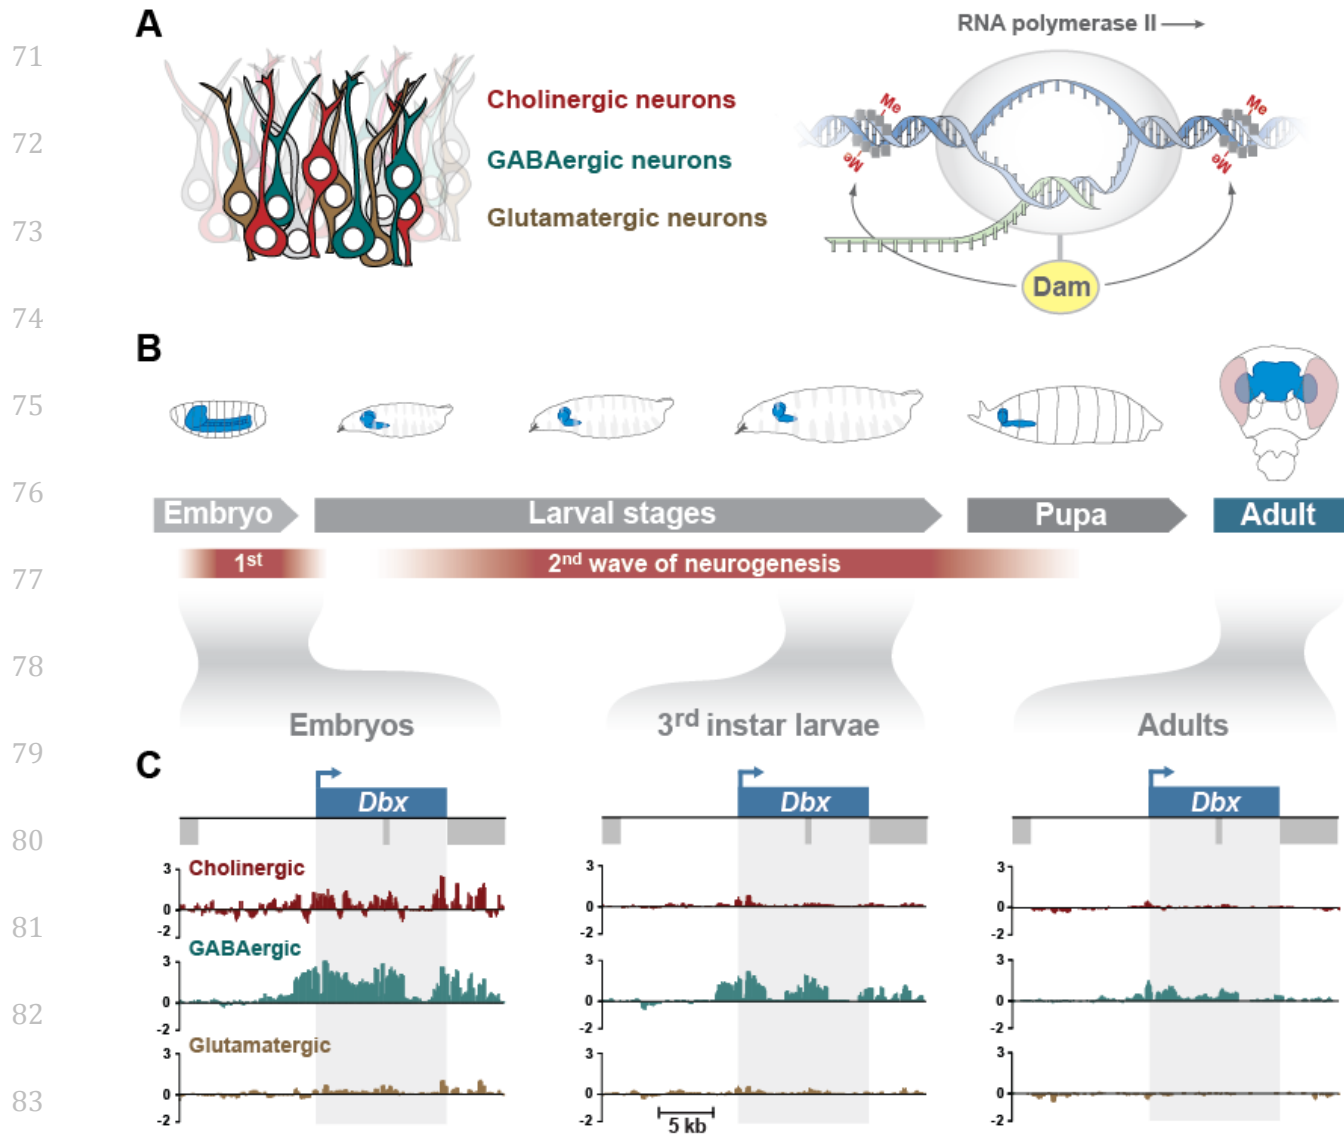

84 **Figure 1. Cell specific profiling of RNA Pol II occupancy in different neuronal subtypes throughout**  
85 **Drosophila development.** A) Profiling of RNA Pol II occupancy in cholinergic, GABAergic and glutamatergic  
86 neurons using TaDa. B) Profiling windows cover embryonic nervous system development (5 - 29 hr AEL), 3rd  
87 instar larval nervous system development (24 hr window before pupation) and the adult brain (heads from  
88 ~ 3-4 day old adults after a 24 hr expression window). Temporal restriction of Dam-Pol II expression was  
89 controlled using a temperature sensitive GAL80. C) An example of a transcription factor gene (*Dbx*) that is  
90 uniquely transcribed in GABAergic neurons. Y-axis represent log<sub>2</sub> ratios of Dam-Pol II over Dam-only.

## 88 Results

### 89 Transcriptional profiling of neuronal subtypes across development

90 In order to investigate which genes participate in the specification of neuronal properties, namely,  
91 neurotransmitter choice, we applied the cell specific profiling technique Targeted DamID (TaDa).  
92 Targeted DamID is based on DamID (van Steensel and Henikoff, 2000) and allows the profiling of  
93 protein-DNA interactions without the need for cell isolation, specific antibodies or fixation (Aughey et  
94 al., 2019; Southall et al., 2013). Transcriptional profiling is also possible with TaDa using the core  
95 subunit of RNA polymerase II (Pol II) (Southall et al., 2013). We have mapped the occupancy of Pol II in  
96 cholinergic, GABAergic and glutamatergic neurons, using specific GAL4 drivers that trap the

97 expression of the genes *ChAT* (choline acetyltransferase), *Gad1* (Glutamic acid decarboxylase 1) and  
98 *VGlut* (vesicular Glutamate transporter) (Diao et al., 2015). During *Drosophila* development, there are  
99 two neurogenic periods, the first to produce the larval nervous system, and the second to produce the  
100 adult nervous system. Therefore, to cover both developing stages and adult neurons, we profiled  
101 embryonic neurons, larval postembryonic neurons and adult neurons (see Figure 1B). Windows of 20  
102 hr (First instar larvae samples), and 24 hr (third instar larvae and adult samples) were used for TaDa  
103 profiling and 3 replicates were performed for each experiment. The number of genes bound by Pol II  
104 ranged from 1170 to 1612 (see Table S1). To investigate the global differences in Pol II occupancy  
105 between neuronal subtypes and developmental stages, we generated a correlation matrix (Figure 2A).  
106 We found that the greatest variability is between developmental stages, rather than between cell  
107 types, with the adult brain data being more distinct from the embryonic and larval stages. When  
108 focusing on transcription factor genes, a similar pattern is evident (Figure 2B).

109 For each developmental stage, we identified uniquely enriched genes (i.e. genes enriched in one  
110 neurotransmitter compared to the other two neurotransmitter subtypes) (Table S2). Encouragingly, a  
111 strong enrichment of Pol II occupancy is evident at *ChAT*, *Gad1* and *VGlut*, the genes encoding the key  
112 enzymes involved in the biosynthesis of these neurotransmitters (Figure S1). Transcription factors  
113 and non-coding RNAs make up a large proportion of all the enriched genes, at each developmental  
114 stage (Figure 2C). In the adult, almost a quarter (23/97) of the enriched genes are transcription  
115 factors. Other enriched genes include the immunoglobulin domain containing *beaten path* (*beat*) and  
116 *Down syndrome cell adhesion molecule* (*Dscam*) genes, which play roles in axon guidance and dendrite  
117 self-avoidance (Pipes et al., 2001; Soba et al., 2007). Glutamatergic genes include *twit* and *Dad*, both of  
118 which are known to regulate synaptic homeostasis at the neuromuscular junction (Goold and Davis,  
119 2007; Kim and Marques, 2012). Interestingly, there is an enriched expression of MAP kinase inhibitors  
120 in cholinergic neurons (Figure 2C). Also, glutamatergic neurons express higher levels of the  
121 monoamine neurotransmitter related genes *Vmat*, *DAT* and *Tdc2*, while GABAergic neurons are  
122 enriched for serotonergic and dopaminergic receptors, relative to the other two fast-acting  
123 neurotransmitter subtypes (Figure 2C). Very few genes show enrichment across all developmental  
124 stages: five for cholinergic (*ChAT*, *ChT*, *acj6*, *Mef2* and *sosie*), five for GABAergic (*Gad1*, *Dbx*, *vg*,  
125 *CG13739* and *CG14989*) and two for glutamatergic (*VGlut* and *oc*) (Table S2). There is consistent  
126 enrichment of the GAL4-trapped genes (*ChAT*, *Gad1* and *VGlut*) (Figure S1) that provide subtype  
127 specific expression for the TaDa experiments.

128 CATaDa profiling of chromatin accessibility (Aughey et al., 2018) reveals that, similar to RNA Pol II,  
129 global chromatin accessibility does not vary greatly between cell types (Figure 2) but shows more  
130 differences between developmental stages. Correspondingly, when examining regions of the genome  
131 that display robust changes in chromatin accessibility (>10 RPM differences across 3 consecutive  
132 GATC fragments) during embryo development, only 37 GATC fragments (13 individual peaks) are  
133 identified, with 62% mapping to the loci of the three neurotransmitter synthesis genes (*ChAT*, *Gad1*

134 and *VGlut*) (Figure S2B and C). Differential accessibility is also present at sites outside of the gene and  
 135 promoter for *Gad1* and *VGlut* (yellow arrows in Figure S2C). Weaker differences in accessibility are  
 136 also observed at some of the differentially expressed transcription factor loci (Figure S2D).

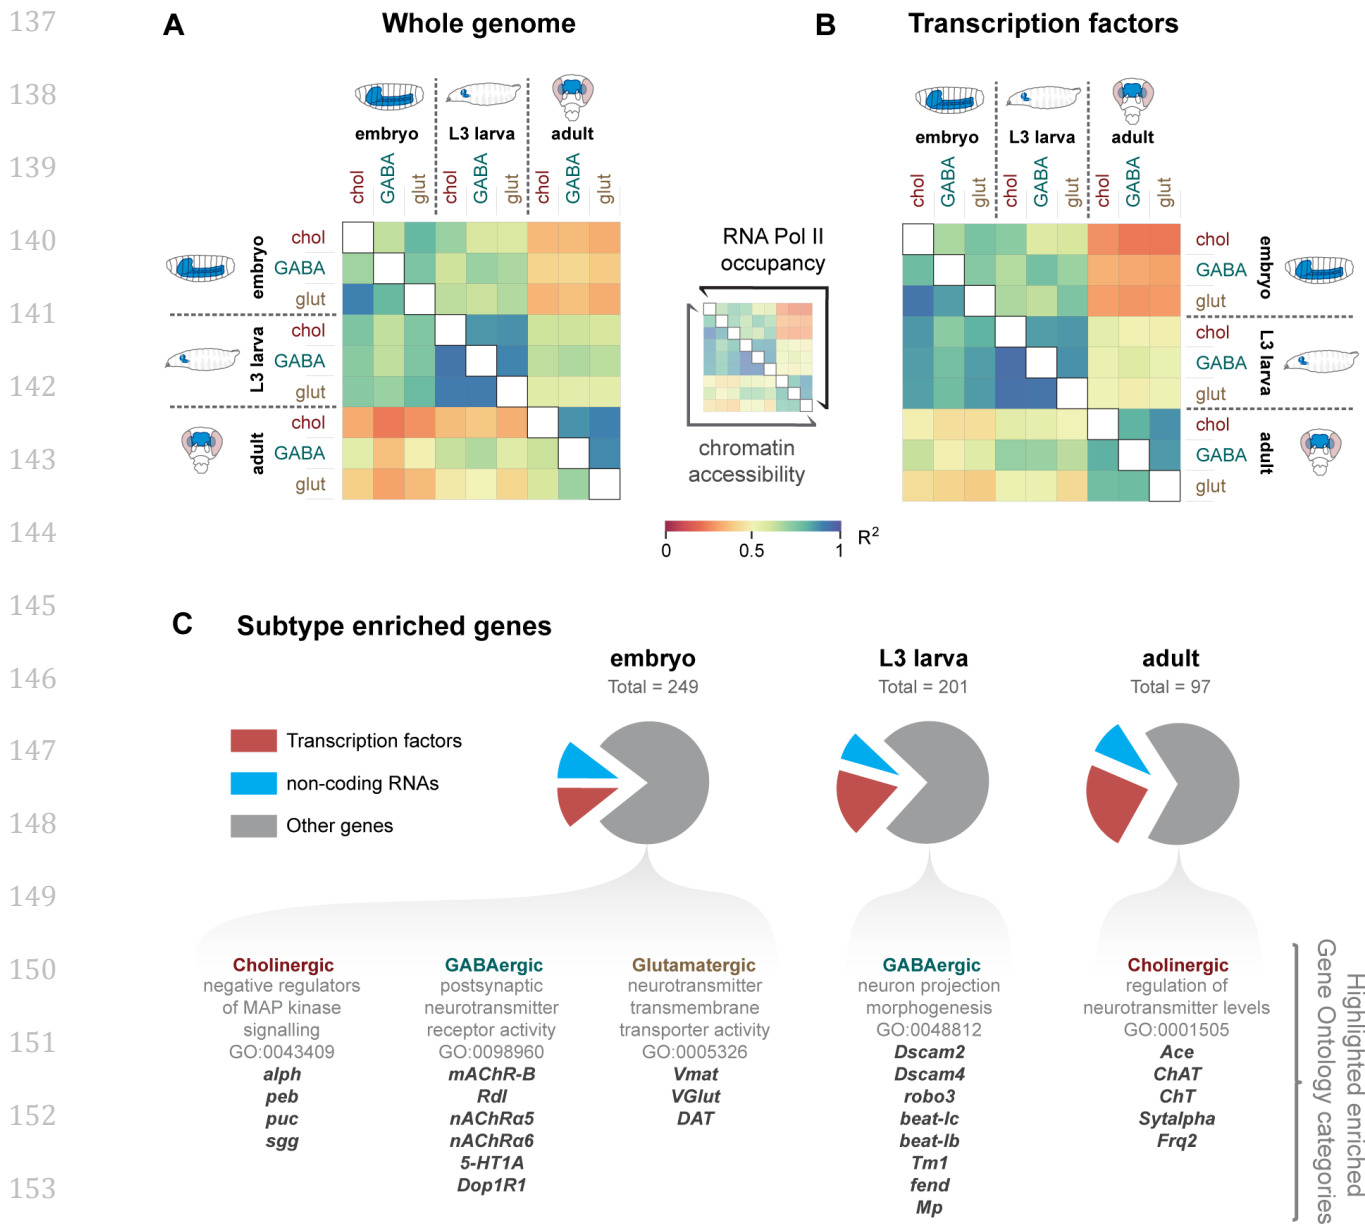

154 **Figure 2. Transcription factors and non-coding RNAs are enriched in specific neurotransmitter subtypes.** A) Correlation matrix for RNA Pol II signal (log2 over Dam-only for all genes) and chromatin accessibility (CATaDa) for all gene loci (extended 5 kb upstream and 2 kb downstream). (B) Correlation matrix for RNA Pol II and chromatin accessibility at annotated transcription factor genes. (C) Proportion of transcription factors and non-coding RNAs at each developmental stage. Examples of enriched GO term categories for the remaining genes are also included.

158 **Identification of transcription factors uniquely enriched, or uniquely depleted in**  
 159 **neurotransmitter subtypes**

160 Transcription factors play the major role in neurotransmitter specification and we have identified  
 161 many with enriched Pol II occupancy in specific neurotransmitter subtypes (Figure 2A). Uniquely



162 enriched transcription factors are candidates for activators of neurotransmitter identity and  
 163 conversely, if there is depletion (or absence) of a transcription factor from only one subtype, they are  
 164 candidates for repressors of neurotransmitter identity. For example, a hypothetical transcription  
 165 factor that represses GABAergic fate would be present in both cholinergic and glutamatergic neurons  
 166 but absent from GABAergic neurons.

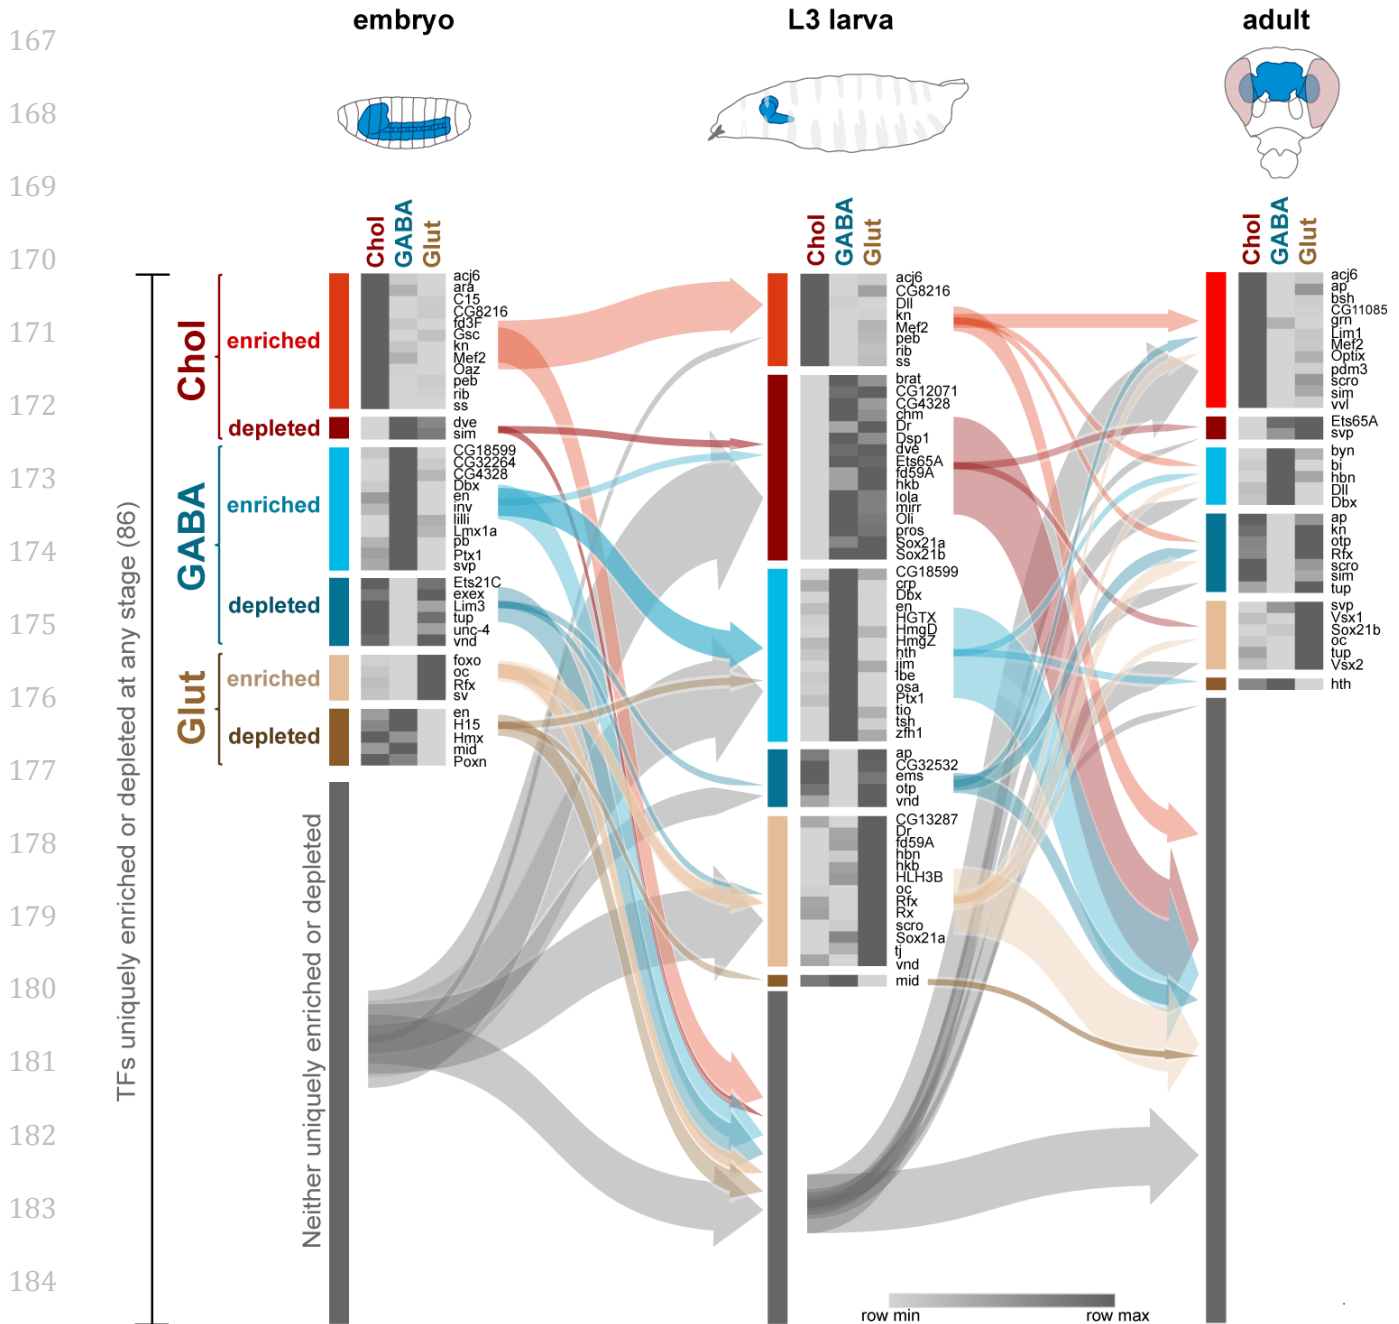

185 **Figure 3. Transitions of uniquely enriched or depleted transcription factors during neural development.**  
 186 Transcription factors uniquely enriched or depleted in cholinergic, GABAergic and glutamatergic neurons. A  
 total of 86 transcription factors are identified across all stages.

187 To investigate the expression pattern dynamics of both uniquely enriched and uniquely depleted  
 188 transcription factors, we examined how their expression patterns transitioned across the stages of  
 189 development (Figure 3). We observe a great deal of flux between transcription factor expression in cell  
 190 types and developmental stages. While *acj6* (cholinergic), *Dbx* (GABAergic - see Figure 1) and *oc*

191 (glutamatergic) are enriched in their respective neurotransmitter type throughout all stages, many are  
 192 only enriched in one or two of the developmental stages. In support of our data, *Acj6* is known to  
 193 promote cholinergic fate in the peripheral nervous system (Lee and Salvaterra, 2002) and *Dbx* is  
 194 important for the proper differentiation of a subset of GABAergic interneurons (Lacin et al., 2009).  
 195 When a gene is enriched in one particular subtype, it tends to either also be enriched in the next  
 196 developmental stage, or is no longer enriched. *Dll* is an unusual case, as it is cholinergic enriched in  
 197 larvae, however switches to being GABAergic enriched in adults (Figure 3 and Figure S3).

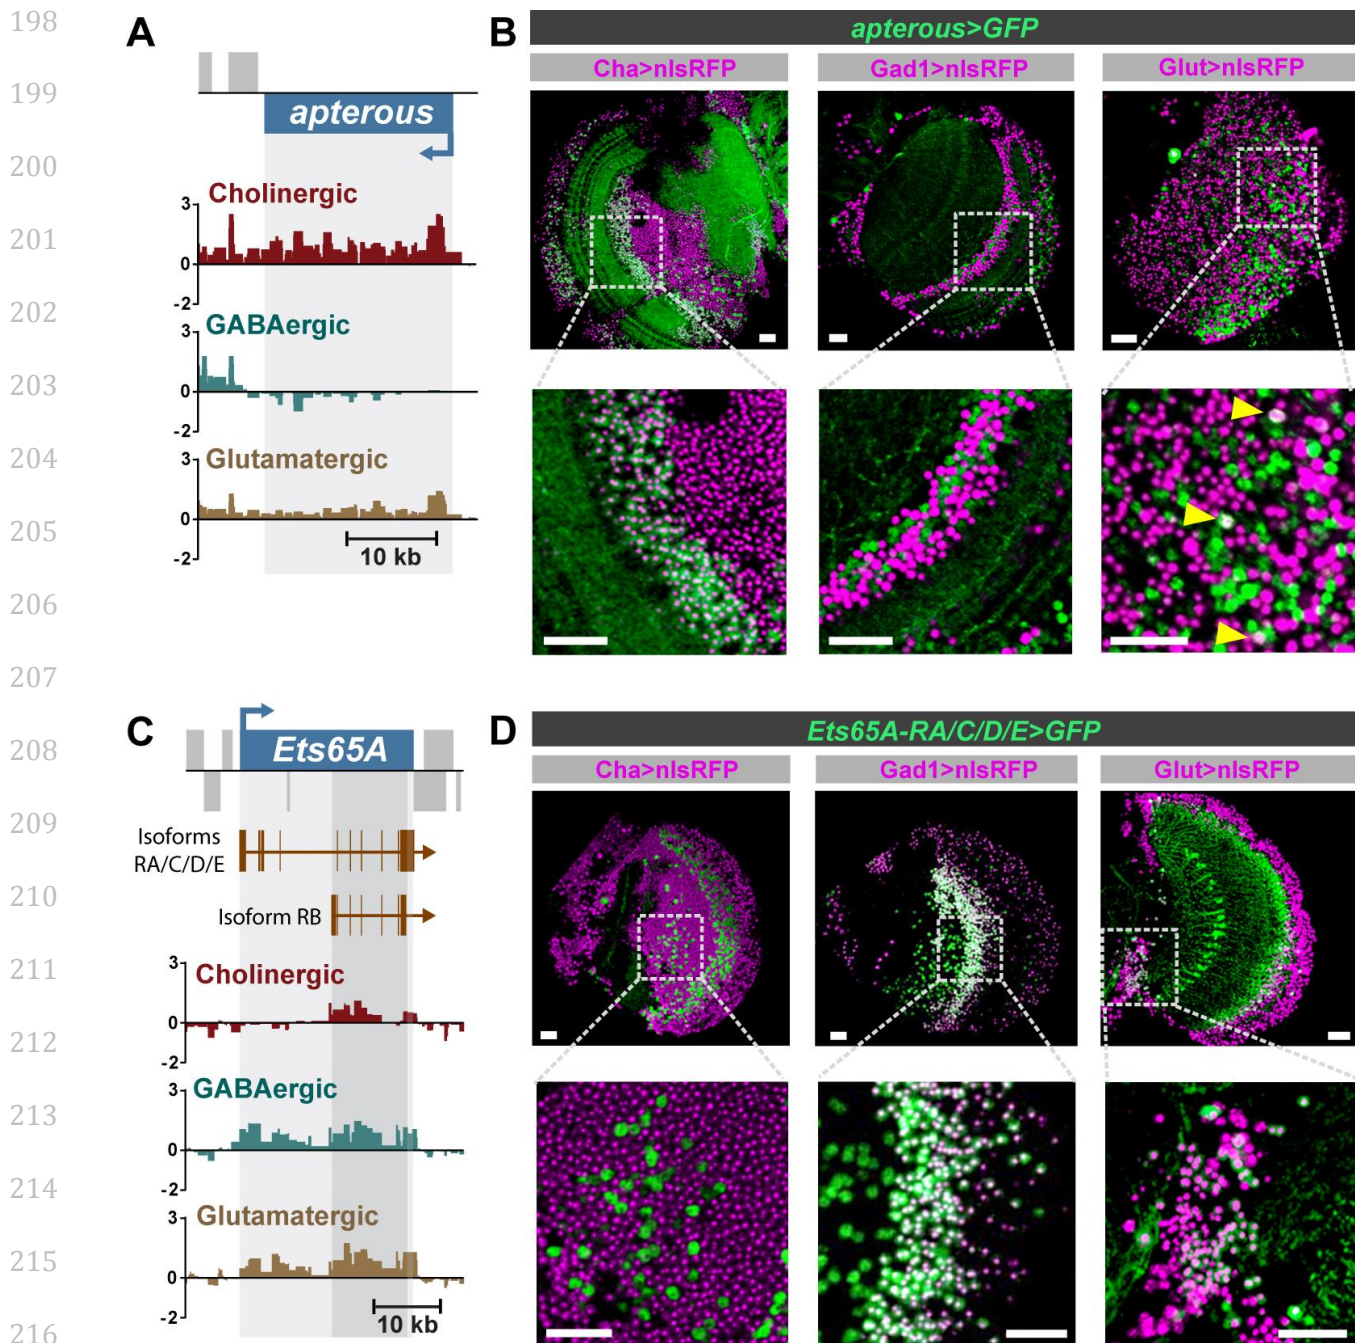

**Figure 4. Absence of *apterous* and *Ets65A-RA/C/D/E* expression in cholinergic and GABAergic adult neurons, respectively.** (A) Pol II occupancy at *apterous* in the adult brain. Y-axis represent log<sub>2</sub> ratios of Dam-Pol II over Dam-only. (B) Expression pattern of *apterous* in the adult brain. (C) Pol II occupancy at *Ets65A* in the adult brain. Y-axis represent log<sub>2</sub> ratios of Dam-Pol II over Dam-only. (D) Expression pattern of *Ets65A-RA/C/D/E* in the adult brain.

219 Candidate repressors of neurotransmitter fate (uniquely depleted transcription factors) also  
220 demonstrate dynamic changes in expression pattern across development (Figure 3). Prominent  
221 examples are the longer transcripts of *Ets65A* (absent in cholinergic) and *apterous* (absent in  
222 GABAergic) (Figure 4A and 4C). We used genetic reporters to examine the expression pattern of  
223 *Ets65A* and *apterous* in adult brains (Figures 4B and 4D). In agreement with our data, the cholinergic  
224 reporter is absent in *Ets65A-RA/C/D/E* positive cells, and the GABAergic reporter absent in *apterous*  
225 positive cells.

226 We have identified transcription factors with potentially novel roles in regulating neurotransmitter  
227 identity. Therefore, we investigated candidate activators and candidate repressors for their potential  
228 to elicit pan-neural reprogramming of neurotransmitter identity. Pan-neural expression and RNAi  
229 knockdown of candidate activator transcription factors (*Dbx*, *en* and *CG4328*) and candidate repressor  
230 transcription factors (*ap* and *otp*) during embryonic development did not result in any obvious  
231 changes in neurotransmitter expression patterns (Figure S4A). To test whether *Ets65A-PA* can repress  
232 cholinergic fate in any neuronal context, we generated overexpression clones in the adult. These  
233 clones contained cells expressing *ChAT* (Figure S4B), therefore, *Ets65A-PA* does not have a universal  
234 capacity to repress cholinergic fate (see Discussion).

235 Focusing on candidate transcription factors demonstrating binary differences (clear on and off), we  
236 performed literature searches to examine whether they have been previously shown, or implicated in  
237 regulating neurotransmitter identity (Figure 5). This included *C. elegans* and mouse orthologues, as  
238 much of the work in this field has utilised these model organisms. For example, the orthologues of  
239 cholinergic enriched *acj6* (*unc-86*), GABAergic enriched *Ptx1* (*PITX1* and *unc-30*) and glutamatergic  
240 enriched *oc* (*OTX1/2* and *ttx-1*) have all shown to have a role in promoting cholinergic, GABAergic and  
241 glutamatergic fate, respectively. However, there are many that have not been investigated in this  
242 context (38%), or that are only supported by indirect evidence (38%). These include *Dll* (*DLX*, *ceh-43*),  
243 *sox21a* (*SOX21*, *sox-3*), *hbn* (*ARX*, *alr1*, *unc-4*) and *otp* (*OTP*, *npax-1*). Given the strong conservation of  
244 neurotransmitter specification mechanisms, many of these newly highlighted factors provide  
245 promising research avenues for expanding our knowledge in this field.

246 While non-coding ribosomal RNAs and tRNAs and are transcribed by RNA polymerase I and III, micro  
247 RNAs (miRNAs) and long non-coding RNAs (lncRNAs) are primarily transcribed by Pol II. Our Dam-Pol  
248 II data identifies a set of differentially bound miRNAs and lncRNAs, between the neurotransmitter  
249 subtypes (Figure S5A). These include non-characterised lncRNAs and GABAergic enriched *iab8*, which  
250 is located in the Hox cluster and plays a role in the repression of *abd-A* (Gummalla et al., 2012). A small  
251 number of miRNAs were also identified, most notably, *mir-87* (cholinergic), *mir-184* (GABAergic) and  
252 *mir-190* (glutamatergic), which are enriched during the developing states but not in the adult.  
253 Although annotated separately, *mir-184* is embedded in *CR44206* (Figure S5B).

254



|               | Gene         | Mammalian orthologue | C. elegans orthologue | Expected role in neurotransmitter specification?<br>(Drosophila and orthologue literature) |             |            | References        |                                                                             |
|---------------|--------------|----------------------|-----------------------|--------------------------------------------------------------------------------------------|-------------|------------|-------------------|-----------------------------------------------------------------------------|
|               |              |                      |                       | Drosophila                                                                                 | Vertebrates | C. elegans |                   |                                                                             |
| Chol          | enriched     | <i>acj6</i>          | <i>Brn3a/POU4F</i>    | <i>unc-86</i>                                                                              | ✓           | ✓          | ✓                 | Lee and Salvaterra, 2002<br>Serrano-Saiz et al., 2018<br>Zhang et al., 2014 |
|               |              | <i>Dll</i>           | <i>DLX</i>            | <i>ceh-43</i>                                                                              | ?           | ?          | ?                 |                                                                             |
|               |              | <i>kn</i>            | <i>EBF</i>            | <i>unc-3</i>                                                                               | ?           | ?          | ✓                 | Kratsios et al., 2012                                                       |
|               |              | <i>peb</i>           | <i>RREB1</i>          | <i>sem-4</i>                                                                               | ?           | ?          | ?                 |                                                                             |
|               |              | <i>rib</i>           | <i>zbtb9</i>          | -                                                                                          | ?           | ?          | ?                 |                                                                             |
|               |              | <i>ss</i>            | <i>AHR</i>            | <i>ahr-1</i>                                                                               | ?           | (✓)        | -                 | Hamzah and Abdullah, 2013                                                   |
|               | depleted     | <i>CG4328</i>        | <i>LMX1B</i>          | <i>lim-6</i>                                                                               | ?           | ?          | ?                 |                                                                             |
|               |              | <i>dve</i>           | <i>SATB1</i>          | <i>dve-1</i>                                                                               | ?           | ?          | ?                 |                                                                             |
|               |              | <i>Ets65A</i>        | <i>FLI1, ERG</i>      | <i>ast-1</i>                                                                               | ?           | (✓)        | ?                 | McKeon, et al., 1988                                                        |
|               |              | <i>fd59A</i>         | <i>FOXD3</i>          | <i>unc-130</i>                                                                             | ?           | ?          | (✓)               | Saraf-Reinach and Sengupta, 2000                                            |
|               |              | <i>hkb</i>           | <i>EGR-1, KLF1</i>    | <i>mm-2, pat-9</i>                                                                         | ?           | ?          | ?                 |                                                                             |
| <i>Sox21a</i> | <i>SOX21</i> | <i>sox-3</i>         | ?                     | ?                                                                                          | ?           |            |                   |                                                                             |
| GABA          | enriched     | <i>CG18599</i>       | <i>NOTO, VAX1</i>     | <i>alr-1</i>                                                                               | ?           | ✓          | (✓)               | Taglialetela et al., 2004<br>Melkman and Sengupta, 2005                     |
|               |              | <i>Dbx</i>           | <i>DBX1</i>           | <i>ceh-51, egl-5</i>                                                                       | (✓)         | (✓)        | ?                 |                                                                             |
|               |              | <i>en</i>            | <i>EN1, EN2</i>       | <i>ceh-16</i>                                                                              | ?           | ✓          | ?                 |                                                                             |
|               |              | <i>HGTX</i>          | <i>Nkx1 / 2</i>       | <i>cog-1</i>                                                                               | ?           | (✓)        | ?                 | Fogarty et al., 2007                                                        |
|               |              | <i>Ptx1</i>          | <i>PITX1</i>          | <i>unc-30</i>                                                                              | ?           | ✓          | ✓                 | Waite et al., 2011<br>Jin et al., 1994<br>Westmoreland et al., 2001         |
|               | depleted     | <i>ap</i>            | <i>LHX2</i>           | <i>ttx-3</i>                                                                               | ?           | ?          | (✓)               | Hobert, 2016                                                                |
|               |              | <i>CG32532</i>       | <i>PROP1</i>          | <i>unc-42</i>                                                                              | ?           | ?          | (✓)               | Serrano-Saiz et al., 2013<br>Hobert, 2016                                   |
|               |              | <i>ems</i>           | <i>EMX1 / 2</i>       | <i>ceh-2</i>                                                                               | ?           | (✓)        | ?                 | Gorski et al., 2002<br>Shinozaki et al., 2002                               |
|               |              | <i>otp</i>           | <i>OTP</i>            | <i>npax-1</i>                                                                              | ?           | ?          | ?                 |                                                                             |
|               |              | <i>vnd</i>           | <i>NKX2-2 / -8</i>    | <i>ceh-22</i>                                                                              | ?           | ?          | ?                 |                                                                             |
| Glut          | enriched     | <i>hbn</i>           | <i>ARX</i>            | <i>alr-1, unc-4</i>                                                                        | ?           | (✓)        | ?                 | Beguin et al., 2013                                                         |
|               |              | <i>oc</i>            | <i>OTX1 / 2</i>       | <i>ttx-1</i>                                                                               | ?           | ✓          | ✓                 | Serrano-Saiz et al., 2013                                                   |
|               |              | <i>Rfx</i>           | <i>RFX</i>            | <i>daf-19</i>                                                                              | ?           | (✓)        | ?                 | Ma et al., 2006                                                             |
|               |              | <i>Rx</i>            | <i>RAX</i>            | <i>ceh-8</i>                                                                               | ?           | ✓          | ?                 | Lu et al., 2013                                                             |
|               |              | <i>scro</i>          | <i>NKX2-1 / -4</i>    | <i>ceh-24</i>                                                                              | ?           | ?          | ?                 |                                                                             |
|               | <i>vnd</i>   | <i>NKX2-2 / -8</i>   | <i>ceh-22</i>         | ?                                                                                          | ?           | ?          |                   |                                                                             |
| depleted      | <i>mid</i>   | <i>Tbx20</i>         | <i>mab-9</i>          | (✓)                                                                                        | ?           | ?          | Leal et al., 2009 |                                                                             |

**Figure 5. Evidence for predicted roles of identified transcription factors.** Strongly enriched or depleted transcription factors identified in developing larval brains. Uniquely enriched factors are predicted to be candidates that promote the respective neurotransmitter fate, whilst uniquely depleted factors are predicted to repress the neurotransmitter fate. A full tick indicates direct evidence that the transcription factor directly promotes or represses the neurotransmitter fate, whilst indirect, supporting evidence is indicated by faded tick in brackets. A question mark signifies that nothing is currently known, regarding neurotransmitter specification.

## 282 **Acj6 and Ets65A-PA directly bind to *ChAT* and other key neuronal differentiation genes**

283 Acj6 is enriched in cholinergic neurons (Figure 3) and is known to promote cholinergic fate (Lee and  
284 Salvaterra, 2002). Acj6 can bind to specific sites upstream of *ChAT* *in vitro* (Lee and Salvaterra, 2002),  
285 however, the extent of Acj6 binding at the *ChAT* locus *in vivo*, and genome wide, is not known. In order  
286 to only profile the cells that endogenously express *acj6*, and therefore gain an more accurate readout  
287 of native Acj6 binding, we used an *acj6* GAL4 line (Lai et al., 2008) to drive the expression of the *Dam-*  
288 *acj6* transgene. Furthermore, we generated an *Ets65A-RA/C/D/E* MiMIC GAL4 trap line to investigate  
289 the *in vivo* binding of Ets65A-PA, with an interest to see whether, as a candidate cholinergic repressor,  
290 it could directly bind the *ChAT* locus. In the adult brain, both factors directly bind the *ChAT* locus  
291 (Figure 6A). Acj6 binds at the upstream region studied by (Lee and Salvaterra, 2002), as well as  
292 strongly within intronic regions of *ChAT*. Ets65A-PA also binds at the same intronic region, however,  
293 it's binding at the upstream region and transcriptional start site of *ChAT* is far more pronounced  
294 (Figure 6A), which may reflect a different mode of regulation.

295 Acj6 and Ets65A-PA bind 2708 and 2277 genes, respectively, using a stringent false discovery rate  
296 (FDR) (FDR < 0.0001) (Table S4). They co-bind 926 genes, which are highly enriched for nervous  
297 system genes, including genes involved in axon development [GO:0061564] and chemical synaptic  
298 transmission [GO:0007268] (Figure 6B). While both factors bind the cholinergic signalling regulator  
299 gene *Acetylcholine esterase (Ace)* gene (Figure 6C), Acj6 uniquely binds *nicotinic Acetylcholine Receptor*  
300 *α4 (nAChRα4)* (Figure 6D) and Ets65A-RA binds multiple genes involved in MAP kinase signalling (e.g.  
301 *hep*, *lic*, *Dsor* and *slpr*) (Figure 6E). Therefore, these factors have the potential to regulate not just a  
302 single neuronal property, but also a multitude of other genes that govern a wide spectrum of neuronal  
303 processes, such as their receptivity to extrinsic signals and synapse formation.

304

## 305 **Discussion**

306 Neurotransmitter identity is a key property of a neuron that needs to be tightly regulated in order to  
307 generate a properly functioning nervous system. Here we have investigated the dynamics and extent  
308 of transcription factor specificity in fast-acting neurotransmitter neuronal subtypes in *Drosophila*. We  
309 profiled the transcription state of cholinergic, GABAergic and glutamatergic neurons in the developing  
310 and adult brain of *Drosophila*. We observe enriched Pol II occupancy at the relevant neurotransmitter  
311 synthesis genes (Figure S1) and other genes associated with the activity of the specific subtypes (Table  
312 S2). The monoamine neurotransmitter related genes *Vmat*, *DAT* and *Tdc2* are enriched in  
313 glutamatergic neurons (Figure 2C), which is not unprecedented, as monoamine populations can also  
314 be glutamatergic (Aguilar et al., 2017; Trudeau and El Mestikawy, 2018). Cholinergic, GABAergic,  
315 serotonergic and dopaminergic receptors are enriched in embryonic GABAergic neurons relative to  
316 the other two fast-acting neurotransmitter subtypes (Figure 2C), which correlates with GABAergic

317 interneurons acting as integrative components of neural circuits. The enrichment of MAP kinase  
 318 pathway regulators in cholinergic neurons is intriguing, suggesting that this signalling pathway may  
 319 have a specific role in these neurons. This is supported by a recent study showing that MAP kinase  
 320 signalling acts downstream of Gq-Rho signalling in *C. elegans* cholinergic neurons to control neuron  
 321 activity and locomotion (Coleman et al., 2018).

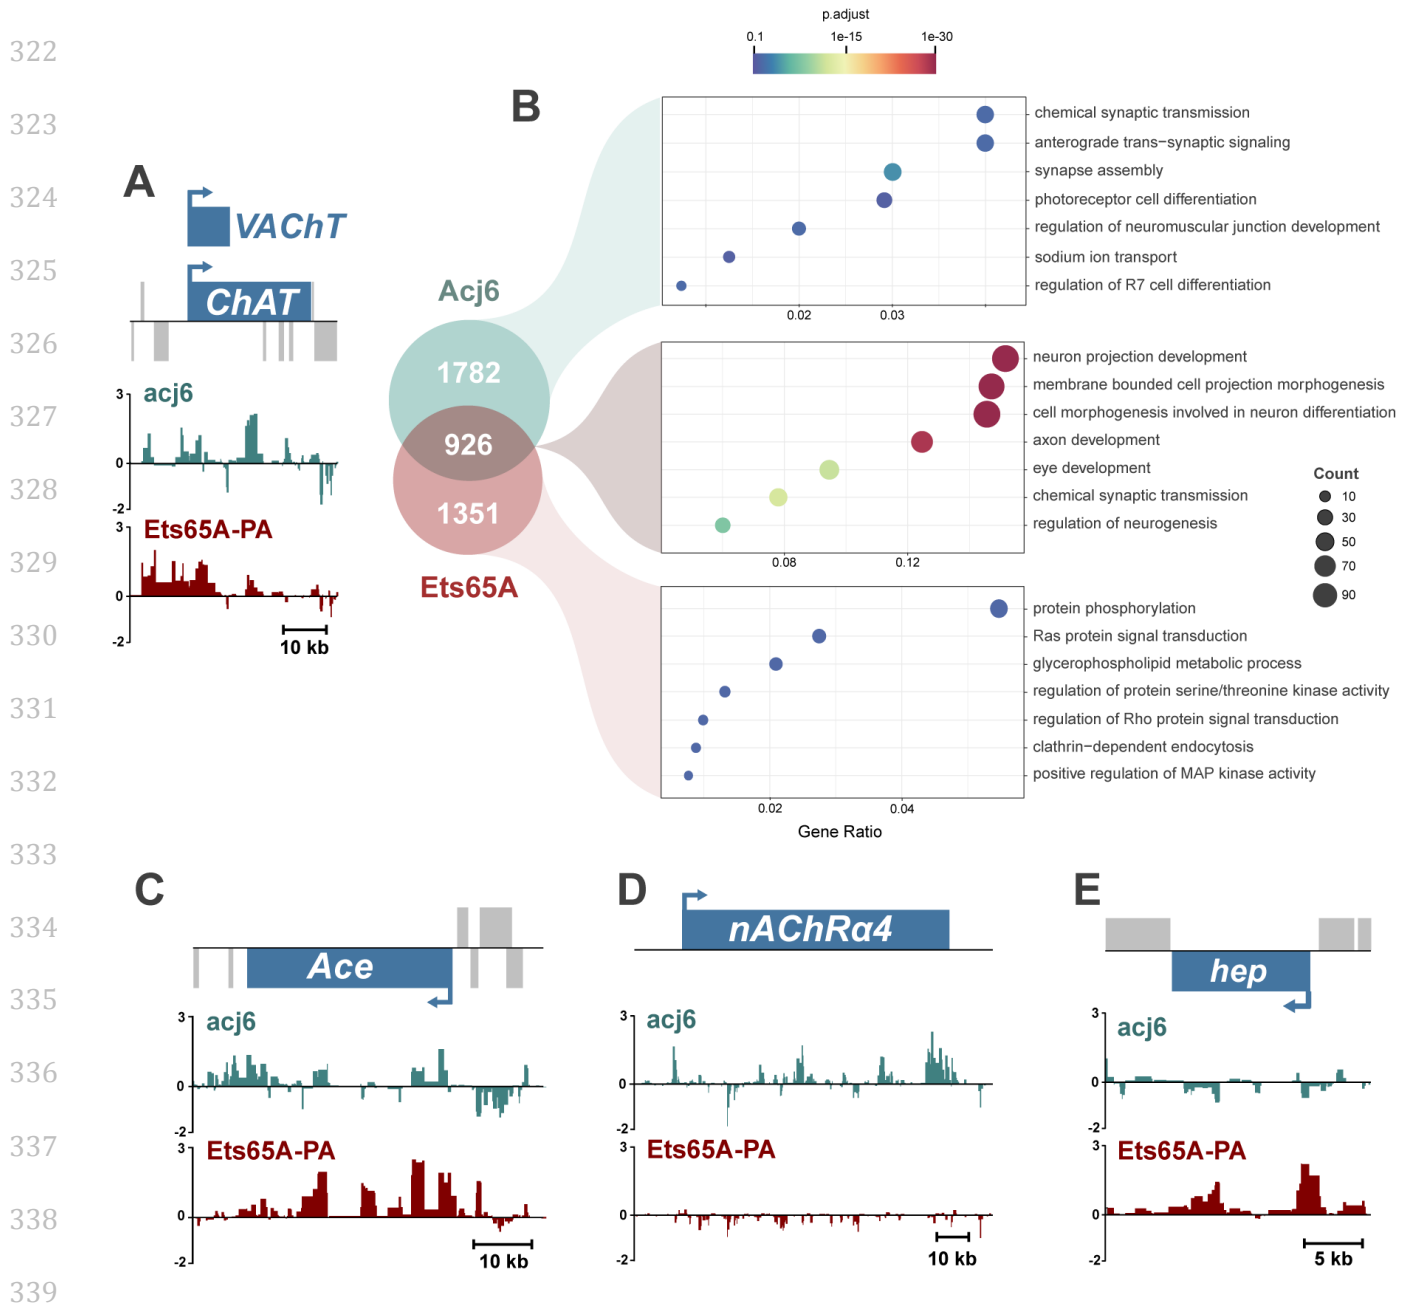

340 **Figure 6. Acj6 and Ets65A-PA co-bind both *ChAT* and a whole suite of genes involved in neuronal**  
 341 **differentiation.** (A) Acj6 and Ets65A-PA binding at *ChAT* (Y-axis represent log<sub>2</sub> ratios of Dam-Pol II over  
 342 Dam-only). (B) Enriched GO term categories for Acj6 and Ets65A-PA bound genes. (C)-(E) Binding at *Ace*,  
 343 *nAChRα4* and *hep*.

342 Importantly, we have uncovered and highlighted transcription factors and non-coding RNAs  
 343 differentially expressed between these subtypes. Some of these are expected based on previous  
 344 studies in *Drosophila*, including *acj6* (cholinergic) (Lee and Salvaterra, 2002) and *Dbx* (GABAergic)  
 345 (Lacin et al., 2009). Also, studies in other model organisms fit with our findings, for example,

346 cholinergic enriched *knot*, whose orthologue, *UNC-3* (*C. elegans*), is a terminal selector for cholinergic  
347 motor neuron differentiation (Kratsios et al., 2011). In addition, *RFX*, the vertebrate orthologue of *Rfx*,  
348 which we identified as glutamatergic enriched, can increase the expression of the neuronal glutamate  
349 transporter type 3 (Ma et al., 2006). However, we have identified many differentially expressed  
350 transcription factors that have not had their role studied with respect to neurotransmitter  
351 specification, or cases where there is supportive, but not direct, evidence for a role in neurotransmitter  
352 specification. For instance, vertebrate neuronal precursors expressing *Nkx2.1* (*HGTX* orthologue)  
353 predominantly generate GABAergic interneurons (Fogarty et al., 2007), and a polyalanine expansion in  
354 *ARX* (*hbn* orthologue) causes remodelling and increased activity of glutamatergic neurons in  
355 vertebrates (Beguin et al., 2013). *Acj6* is expressed in a subset of cholinergic neurons (Lee and  
356 Salvaterra, 2002) and *Dbx* in a subset of GABAergic neurons (Lacin et al., 2009). To the best of our  
357 knowledge, none of the enriched transcription factors we identified are expressed in all of the neurons  
358 of a particular neurotransmitter subtype. This highlights that, similar to *C. elegans*, there are no simple  
359 transcription factor codes for neurotransmitter type specification in *Drosophila*.

360 Uniquely enriched factors are candidates for promoting a neurotransmitter fate, and we tested a  
361 number of them for their ability to reprogram neurons on a global scale in embryos (Figure S4A). No  
362 obvious changes were observed, however, this is not particularly surprising considering the  
363 importance of cellular context for the reprogramming of neuronal properties (Duggan et al., 1998;  
364 Wenick and Hobert, 2004). Successful reprogramming may require intervention at a specific time point  
365 (e.g. at the progenitor stage) and/or the co-expression of appropriate co-factors. Future work could  
366 investigate these factors in specific and relevant lineages, to shed light on important contextual  
367 information.

368 The majority of transcription factors identified as directly regulating neurotransmitter fate act in a  
369 positive manner, whereas only a handful of studies describe the role of repressors. Incoherent  
370 feedforward loops exist in *C. elegans*, where terminal selectors activate repressors, which feedback  
371 onto effector genes (for review, see (Hobert, 2016)). In vertebrates, both *Neurogenin 2* and *Tlx3* are  
372 required for the specification of certain glutamatergic populations but also act to repress GABAergic  
373 fate (Cheng et al., 2004; Schuurmans et al., 2004). Whether this is direct repression of *Glutamic acid*  
374 *decarboxylase* (*Gad*) genes (required for the synthesis of GABA), or indirectly, through another  
375 transcription factor, is unclear. We have identified several transcription factors that are expressed in  
376 two neurotransmitter subtypes, but absent from the other. These include *apterous* (*ap*), *Ets65A* (long  
377 transcripts) and *orthopedia* (*otp*), which we hypothesise to be candidate repressors, given their  
378 absence from cells with a specific neurotransmitter identity. Our profiling of *Ets65A*-PA binding *in*  
379 *vivo*, reveals that it directly binds *ChAT* (Figure 6A), and therefore has the potential to directly regulate  
380 cholinergic fate. Similar to the candidate activators, ectopic expression of these candidates did not  
381 show any obvious repression of the respective neurotransmitter genes (Figure S4B), however, again,  
382 this might be because they can only act as a repressor in specific contexts (e.g. when a co-repressor is



383 present), or that they regulate genes associated with specific subtypes but don't directly regulate  
384 neurotransmitter identity.

385 The development of single cell RNA-seq (scRNA-seq) technology has led to the profiling of several  
386 *Drosophila* tissues, including the whole adult brain (Davie et al., 2018), the central adult brain (Croset  
387 et al., 2018) and the adult optic lobes (Konstantinides et al., 2018). Konstantinides and colleagues  
388 investigated the association of transcription factors with neurotransmitter identity, and although it is  
389 optic lobe, and not whole brain data, we observe similar trends. For example, they identified *apterous*  
390 as cholinergic enriched and *Lim3* as GABAergic enriched, both of which show respective enrichment in  
391 our data (1% FDR and 0.15 log2 thresholds). We also identified *apterous* as uniquely enriched in adult  
392 brain cholinergic neurons, but also as GABAergic depleted in larval and adult stages (Figure 3), as  
393 there is robust Pol II occupancy at *apterous* in glutamatergic neurons (Figure 4C) and co-expression in  
394 the brain (Figure 4D), which fits well with the whole brain scRNA-seq (Davie et al., 2018) (Figure S6).  
395 *ap*, *Dll* and *svp* were also identified in by Davis and colleagues when they sequenced different neural  
396 populations of the adult optic lobe using TAPIN-seq (Davis et al., 2018).

397 We observed more differentially expressed transcription factors in the L3 larval stage (58) compared  
398 to the embryo (40) or adults (33). This may reflect the existence of both the functioning larval nervous  
399 system (built during embryogenesis) and the developing adult nervous system at this stage (Figure 3).  
400 While both the embryo and larval data are similar on a global scale, Pol II occupancy and chromatin  
401 accessibility in the adult brain is less correlated (Figure 2). It is currently unclear whether this is due  
402 to adult VNCs being absent from the profiling experiments, or differences between immature and fully  
403 mature neurons, such as overall lower transcriptional activity in adults. We have previously shown  
404 that global chromatin accessibility distribution in adult neurons is distinct from larval neurons  
405 (Aughey et al., 2018), which may account for some of these differences.

406 Apart from the neurotransmitter synthesis genes, the chromatin accessibility of the subtypes, at a  
407 given stage, is surprisingly similar, as demonstrated in embryos (Figure 6). The enriched accessibility  
408 is not just restricted to the gene bodies of the neurotransmitter genes, and peaks are present upstream  
409 (*Gad1*) and downstream (*VGlut*) (Figure 6B), which are likely enhancers. Accessibility at the *ChAT* gene  
410 is clearly higher in cholinergic neurons at the embryonic and adult stages, however, in L3 larvae, the  
411 difference is less pronounced (Figure 6B). This could reflect increased plasticity at this stage, possibly  
412 linked to the dramatic remodelling of larval neurons during metamorphosis (for a review, see (Yaniv  
413 and Schuldiner, 2016)). While a subset of transcription factors display obvious contrasts in Pol II  
414 occupancy, the same transcription factors have no observable, or minor, differences in accessibility  
415 (Figure 6C). This could be due to transcription factors being expressed at relatively lower levels  
416 and/or that they are only expressed in a subset of the cells, therefore the difference is less prominent.

417 Evidence is emerging for the roles of miRNAs in generating neuronal diversity, including the  
418 differentiation of taste receptor neurons in worms (Chang et al., 2004; Johnston and Hobert, 2005) and

419 dopaminergic neurons in vertebrates (Kim et al., 2007). Here, we found the enriched expression of  
420 *mir-184* in GABAergic cells (Figure S5B), which is intriguing, as *mir-184* has been shown to  
421 downregulate *GABRA3* (GABA-A receptor) mRNA (possibly indirectly) in vertebrate cell lines (Luo et  
422 al., 2017), and may be a mechanism to help prevent GABAergic neurons self-inhibiting. Furthermore,  
423 *mir-87* has enriched RNA polymerase II occupancy in cholinergic neurons (Figure S5A), and when  
424 mutated causes larval locomotion defects in *Drosophila* (Picao-Osorio et al., 2017).

425 *Acj6* is expressed in cholinergic neurons (Figure 3)(Lee and Salvaterra, 2002) , whilst *Ets65A-PA* is  
426 expressed in non-cholinergic neurons (Figure 4C and D). However, despite this, they bind a large  
427 number of common target genes (Figure 6). This includes 20% (101/493) of all genes annotated for a  
428 role in "neuron projection development" (GO:0031175). This is quite striking, especially as this is in the  
429 adult, where there is virtually no neurogenesis or axonogenesis. However, this may reflect dendritic  
430 re-modelling processes, or a requirement of neurons to continuously express transcription factors,  
431 even after development, to maintain their fate. The *acj6* orthologues, *unc-86* and *Brn3a* are both  
432 required to maintain the fate of specific cholinergic populations (Serrano-Saiz et al., 2018), and  
433 transcriptional networks that specific Tv1/Tv4 neurons in *Drosophila* are also required to maintain  
434 them in the adult (Eade et al., 2012). Therefore, the binding of *Acj6* and *Ets65A-PA* to developmental  
435 genes and *ChAT* in adult neurons could be required for the continued activation (and repression) of  
436 genes governing neuronal identity. MAP kinase signalling genes are enriched in cholinergic neurons  
437 (Figure 2C) and *Ets65A-PA* specifically binds MAP kinase signalling genes (Figure 6), making it  
438 tempting to speculate that *Ets65A-PA* acts to repress cholinergic specific genes such as *ChAT* and MAP  
439 kinase genes. These *Acj6* and *Ets65A-PA* data also emphasise the diverse set of neuronal  
440 differentiation genes a single transcription factor could regulate.

441 The precise synthesis and utilisation of neurotransmitters ensures proper information flow and circuit  
442 function in the nervous system. The mechanisms of specification are lineage specific, predominantly  
443 through the action of transcription factors. Here we have provided further insights into the  
444 complement of different transcription factors that regulate neurotransmitter identity throughout  
445 development. Furthermore, we identified the genomic binding of a known activator, and a candidate  
446 repressor, of cholinergic fate in the adult, emphasising the broad spectrum of neural identity genes  
447 that they could be regulating outside of neurotransmitter use. Given the strong evidence for conserved  
448 mechanisms controlling neurotransmitter specification, these data will be a useful resource for not  
449 just researchers using *Drosophila* but other other model systems too. Continued work to elucidate the  
450 mechanisms, co-factors and temporal windows in which these factors are acting will be fundamental  
451 in gaining a comprehensive understanding of neurotransmitter specification.

452

453

## 454 **Materials and Methods**

### 455 ***Drosophila* lines**

456 Lines used in this study are as follows:

457 *w; dvGlut-GAL4 [MI04979]/CyO act-GFP*, (Bloomington #60312)

458 *w;; ChAT-GAL4 [MI04508] / TM3 act GFP*, (Bloomington #60317)

459 *w;; Gad1-GAL4 [MI09277] / TM3 actin GFP* (Diao et al., 2015)

460 *w[\*]; Mi{Trojan-lexA:QFAD.2}VGlut[MI04979-TlexA:QFAD.2]/CyO, P{Dfd-GMR-nvYFP}2*, (Bloomington  
461 #60314)

462 *w[\*]; Mi{Trojan-lexA:QFAD.0}ChAT[MI04508-TlexA:QFAD.0]/TM6B, Tb[1]*, (Bloomington #60319)

463 *w[\*]; Mi{Trojan-lexA:QFAD.2}Gad1[MI09277-TlexA:QFAD.2]/TM6B, Tb[1]*, (Bloomington, #60324).

464 (All obtained from M. Landgraf)

465 *UAS-LT3-NDam, tub-GAL80<sup>ts</sup>; UAS-LT3-NDam-RNA Pol II* (from Andrea Brand)

466 *Ets65A-RA/C/D/E-GAL4 [MI07721]* (this study)

467 *apterous-GAL4; UAS-GFP* (from F Jiménez Díaz-Benjumea)

468 *acj6-GAL4-UAS-mCD8-GFP/FM7c; Pin/CyO* (from DJ Luginbuhl) (Lai et al., 2008)

469 *elavG4;; Mi{PT-GFSTF.2}Gad [MI09277]/TM3 actin-GFP* (from Bloomington, #59304)

470 *UAS-Dbx* (Bloomington, #56826)

471 *UAS-apterous* (from F Jiménez Díaz-Benjumea),

472 *UAS-engrailed [E9]* (from Andrea Brand)

473 *UAS-otp* (Fly ORF #F000016)

474 *UAS-CG4328* (FlyORF, #F0019111)

475 *UAS-Dbx sh RNAi attP40* (VDRC #330536)

476 *UAS-ap sh RNAi attP40* (VDRC #330463)

477 *UAS-Ets65A-RA attP2* (this study)

478 *yw, hs-Flp 1; +; Dr/TM6B*

479 *yw, hs-Flp 1; +; UAS-Ets65A-RA*

480 *AyGal4, UAS-mCD8-GFP/(CyO); Cha lexAQF, mCherry /TM6B*

### 481 **Generation of *Ets65A* and *acj6* Targeted DamID lines**

482 Details and sequences of all primers used for generating constructs are shown in Supplemental  
483 Experimental Procedures. *pUAST-LT3-NDam-acj6-RF* and *pUAST-LT3-NDam-Ets65A-RA* were  
484 generated by PCR amplifying *acj6-RF* and *Ets65A-RA* from an embryonic cDNA library. The resulting

485 PCR products were cloned into *pUAST-LT3-Dam* plasmid (Southall et al., 2013) with NotI and XhoI  
486 sites, using Gibson assembly.

487 acj6-RF FW:

488 CATCTCTGAAGAGGATCTGGCCGGCGCAGATCTGCGGCCGCTCATGACAATGTCGATGTATTCGACGACGG

489 acj6-RF RV:

490 GTCACACCACAGAAGTAAGGTTCCCTTCACAAAGATCCTCTAGATCAGTATCCAAATCCCGCCGAACCG

491 Ets65A-RA FW:

492 CTGAAGAGGATCTGGCCGGCGCAGATCTGCGGCCGCTCATGTACGAGAACTCCTGTTTCGTATCAGACG

493 Ets65A-RA RV:

494 ACAGAAGTAAGGTTCCCTTCACAAAGATCCTCTAGATCATGCGTAGTGGGGATAGCTGCTC

#### 495 **Generation of *Ets65A-RA-GAL4* line**

496 *Ets65A-RA/C/D/E-GAL4* was generated by inserting a GAL4 trap cassette into the MI07721 MiMIC line  
497 (Bloomington #43913) using the triplet donor *in vivo* system described in (Diao et al., 2015).

#### 498 **Targeted DamID (TaDa) for RNA-Pol II mapping**

499 Crosses producing larvae with the following genotypes were allowed to lay eggs over a minimum of  
500 two days at 25°C before timed collections were performed:

501 *tub-GAL80<sup>ts</sup>/+; UAS-LT3-NDam/ ChAT-GAL4<sup>MI04508</sup>*

502 *tub-GAL80<sup>ts</sup>/+; UAS-LT3-NDam-RNA Pol II/ ChAT-GAL4<sup>MI04508</sup>*

503 *tub-GAL80<sup>ts</sup>/+; UAS-LT3-NDam/ Gad1-GAL4<sup>MI09277</sup>*

504 *tub-GAL80<sup>ts</sup>/+; UAS-LT3-NDam-RNA Pol II/ Gad1-GAL4<sup>MI09277</sup>*

505 *tub-GAL80<sup>ts</sup>/ dvGlut-GAL4<sup>MI04979</sup>; UAS-LT3-NDam/ +*

506 *tub-GAL80<sup>ts</sup>/ dvGlut-GAL4<sup>MI04979</sup>; UAS-LT3-NDam-RNA Pol II/ +*

507 **First instar larvae samples:** Crosses of the right genotype were allowed to lay old eggs for 2 hours at  
508 25°C in fly cages. Wet yeast and two drops of 10% acetic acid were added to apple juice plates to  
509 promote egg laying. Then, egg laying was done for 5 hours at 25°C, apple juice plates containing those  
510 embryos were transferred to 29°C (permissive temperature) for 20 hours. After this time, first instar  
511 larvae were collected and stored in 1x PBS. Samples were flash-frozen in dry ice, and stored at -80°C  
512 till the appropriate amount of tissue was enough to start the experiment. No selection for the right  
513 genotype was done, and 20 µl worth of volume of tissue was used as a proxy to determine the  
514 appropriate amount of material for each replicate. 3 replicates were done for each experiment. With  
515 this husbandry protocol, the collected first instar larvae were around 12 hours ALH (after larvae  
516 hatching), just before the first larval neurons are being generated, then providing the transcriptome of  
517 embryonic neurogenesis.



518 **Third instar larvae samples:** Crosses of the right genotypes were allowed to lay eggs for 6 hours at  
519 25°C in fly food vials. These vials were then transferred to 18°C (restrictive temperature) for 7 days.  
520 They were then moved to 29°C (permissive temperature) for 24 hours. Wandering stage larvae,  
521 around 96h ALH, were selected with a GFP scope for the right genotype. Larvae were dissected in 1x  
522 PBS, leaving the anterior half of the larvae partly dissected, containing the CNS, but removing the gut  
523 and all the fat tissue. Samples were flash-frozen in dry ice, and stored at -80°C till the appropriate  
524 amount of tissue was enough to start the experiment. 100 partly dissected CNS were used for each  
525 replicate. 3 replicates were done for each experiment.

526 **Adult samples:** Crosses of the right genotypes were allowed to lay eggs for 2 days at 18°C in fly food  
527 vials. Vials containing those eggs were kept at 18°C (restrictive temperature) till adult flies eclosed.  
528 They were then kept at 18°C for 5-10 days. After that, they were selected according for the right  
529 genotype, and transferred to 29°C (permissive temperature) for 24 hours. Then, adult flies were flash-  
530 frozen in dry ice, and stored at -80°C. Around 50 fly heads were used for each replicate. 3 replicates  
531 were done for each experiment.

532 When preparing the tissue to be used, larvae nor flies were sex sorted. It has been recently reported  
533 that transcriptomes from males and females, obtained with a cell specific driver combination  
534 expressed in neurons in the adult optic lobe, do not present major differences in their transcriptomes.  
535 Only a small number of genes, known sex-specific genes showed differences between sexes. (Davis et  
536 al., 2018).

537 Our DamID protocol was based on (Southall et al., 2013), and (Marshall et al., 2016). Briefly, DNA was  
538 extracted using Qiagen DNeasy kit, and a minimum of 3 µg of DNA was precipitated for first instar  
539 larvae, 6µg for third instar larvae, and 2.5 µg for adult samples. DNA was digested with DpnI overnight  
540 at 37°C. The next morning, 0.5 µl of DpnI was added for 1 hour extra incubation, followed by DpnI heat  
541 inactivation (20 mins 80°C). Either Advantage cDNA polymerase, or Advantage 2 cDNA polymerase  
542 mix, 50x, Clontech, were used in PCR amplification. Enzymes Sau3AI or AlwI were used to remove  
543 DamID adaptors, from sonicated DNA.

544 Libraries were sequenced using Illumina HiSeq single-end 50 bp sequencing. Three replicates were  
545 performed for each experiment. A minimum of 25 million reads were obtained from the first instar  
546 larvae samples, 30 million reads from the third instar larvae, and 9 million reads from the adults'  
547 samples.

#### 548 **Targeted DamID (TaDa) for identification of *acj6* and *Ets65A*-RA binding sites**

549 Crosses producing larvae with the following genotypes were allowed to lay eggs over a minimum of  
550 two days at 25°C:

551 *acj6-GAL4-UAS-GFP; tub-GAL80<sup>ts</sup>/+; UAS-LT3-NDam/+*

552 *acj6-GAL4-UAS-GFP; tub-GAL80<sup>ts/+</sup>; UAS-LT3-NDam-acj6-RF/+*

553 *tub-GAL80<sup>ts/+</sup>; UAS-LT3-NDam/ Ets65A-RA-GAL4<sup>M107721</sup>*

554 *tub-GAL80<sup>ts/+</sup>; UAS-LT3-NDam-Ets65A-RA/ Ets65A-RA-GAL4<sup>M107721</sup>*

555 Crosses of the right genotypes were allowed to lay eggs for 2 days at 18°C in fly food vials. Vials  
556 containing those eggs were kept at 18°C (restrictive temperature) till adult flies eclosed. They were  
557 then kept at 18°C for around 10 days. Then, they were transferred to 29°C (permissive temperature)  
558 for 24 hours, selected according for the right genotype, flash-frozen in dry ice, and stored at -80°C. A  
559 minimum of 150 fly heads were used for each replicate. 2 replicates were done for each experiment.

560 The DamID protocol used for these samples is the same as described above, with minor changes, 6 µg  
561 of DNA were precipitated, Bioline Polymerase was used in the PCR amplification, and only AlwI was  
562 used to remove adaptors from sonicated DNA. Libraries were sequenced using Illumina HiSeq single-  
563 end 50 bp sequencing. Two replicates were acquired for each experiment. A minimum of 10 million  
564 reads were obtained these samples.

### 565 **Targeted DamID data analysis**

566 Sequencing data for TaDa and CATaDa were mapped back to release 6.03 of the *Drosophila* genome  
567 using a previously described pipelines (Aughey et al., 2018; Marshall and Brand, 2015). Transcribed  
568 genes (defined by Pol II occupancy) were identified using a Perl script described in (Mundorf et al.,  
569 2019) based on one developed by (Southall et al., 2013) (available at  
570 [https://github.com/tonysouthall/Dam-RNA\\_POLII\\_analysis](https://github.com/tonysouthall/Dam-RNA_POLII_analysis)). *Drosophila* genome annotation release  
571 6.11 was used, with 1% FDR and 0.2 log<sub>2</sub> ratio thresholds. To compare data sets, log<sub>2</sub> ratios were  
572 subtracted, in this case, producing 3 replicate comparison files (as 3 biological replicates were  
573 performed). These data were then analysed as described above to identify genes with significantly  
574 different Pol II occupancy. Due to the presence of negative log<sub>2</sub> ratios in DamID experiments, these  
575 genes were filtered to check that any significantly enriched genes were also bound by Pol II in the  
576 experiment of interest (numerator data set). A gene list was generated from the transcript data using  
577 the values from the associated transcript with the most significant FDR. Correlation values (Figure 2)  
578 were visualised using Morpheus (<https://software.broadinstitute.org/morpheus/>). The transition plot  
579 (Figure 3) was generated in R using the transitionPlot function from the Gmisc R package  
580 (<http://gforge.se/>). Enrichment GO analysis was performed using the R package clusterProfiler (Yu et  
581 al., 2012)

582 For *acj6* and *Ets65A-RA* TaDa, peaks were called and mapped to genes using a custom Perl program  
583 (available at [https://github.com/tonysouthall/Peak\\_calling\\_DamID](https://github.com/tonysouthall/Peak_calling_DamID)) In brief, a false discovery rate  
584 (FDR) was calculated for peaks (formed of two or more consecutive GATC fragments) for the  
585 individual replicates. Then each potential peak in the data was assigned a FDR. Any peaks with less  
586 than a 0.01% FDR were classified as significant. Significant peaks present in all replicates were used to

587 form a final peak file. Any gene (genome release 6.11) within 5 kb of a peak (with no other genes in  
588 between) was identified as a potentially regulated gene.

### 589 **Immunostaining and imaging**

590 Third instar larval CNS or adult brains were dissected in 1x PBS. They were fixed in 4% formaldehyde  
591 (methanol free) 0.1% Triton X-100 PBS (PBST), for 30 minutes at room temperature. Samples were  
592 then rinsed twice with 0.1% PBST, and washed four times for 1 hour with 0.1% PBST. 5% Normal Goat  
593 Serum in 0.1% PBST was used as a blocking agent for 1 hour at room temperature. Brains were then  
594 incubated overnight at 4°C with primary antibodies in 5% Normal Goat Serum in 0.1% PBST. The  
595 primary antibodies used were: anti-Chicken-GFP (Abcam #13970, 1:2000), and anti-Rabbit-DsRed  
596 (Clontech #632496, 1:500). Brains were rinsed twice with 0.1% PBST, and washed four times with  
597 0.1% PBST for 1 hour. Secondary antibodies were diluted in 5% Normal Goat Serum in 0.1% PBST and  
598 incubated with the brains for 1 hour at room temperature. The secondary antibodies used were: anti-  
599 Chicken-Alexa 488 (Thermo Scientific #A11039, 1:500), and anti-Rabbit-Alexa 546 (Thermo Scientific  
600 #A11010, 1:500). Samples were then rinsed twice with 0.1% PBST, and washed four times for 1 hour.  
601 Brains were mounted on glass cover slides in Vectashield (Vector laboratories). All incubations and  
602 washes were performed in a rotator. After dissection of first instar larvae CNS, they were placed in a  
603 polylysine coated microscope slide, where we performed all the incubations. Both experimental CNS  
604 and wild-type CNS were placed on the same slide. Images were acquired using a Zeiss LSM 510  
605 confocal microscope and edited using Fiji/Image J. For the *Ets65A-RA* overexpression clones, *AyGal4*,  
606 *UAS-mCD8-GFP/(CyO)*; *Cha lexAQF*, *mCherry /TM6B* was crossed with *UAS-Ets65A-RA*, and adults were  
607 heat-shocked for 1 hour at 37°C, at both 24 hours ALH (after larvae hatching) and 48 hours ALH.  
608 Brains were dissected from 5-8 days old adults.

### 609 **Accession numbers**

610 All raw sequence files and processed files have been deposited in the National Center for  
611 Biotechnology Information Gene Expression Omnibus (accession number GSE139888).

### 612 **Acknowledgements**

613 We would like to thank Matthias Landgraf, Eva Higginbotham, and Gabriel Aughey for feedback and  
614 advice on this project. We would like to thank Matthias Landgraf, Holly Ironfield, Benjamin White,  
615 Andrea Brand, Fernando J. Diaz-Benjumea, David John Luginbuhl, for providing fly stocks. For other fly  
616 stocks, we also thank Bloomington *Drosophila* Stock Center (NIH P400D018537), the Vienna  
617 *Drosophila* Resource Center (VDRC, [www.vdrc.at](http://www.vdrc.at)), and the FlyORF, Zurich ORFeome Project  
618 (<https://flyorf.ch/>). This work was funded by Wellcome Trust Investigator grant 104567 to T.D.S.

619

## 620 **Figure Legends**

621 **Figure 1. Cell specific profiling of RNA Pol II occupancy in different neuronal subtypes**  
622 **throughout Drosophila development.** Profiling of RNA Pol II occupancy in cholinergic, GABAergic  
623 and glutamatergic neurons using TaDa. Profiling windows cover embryonic nervous system  
624 development (5 - 25 hr AEL), 3rd instar larval nervous system development (24 hr window before  
625 pupation) and the adult brain (heads from ~ 3-4 day old adults after a 24 hr expression window).  
626 Temporal restriction of Dam-Pol II expression was controlled using a temperature sensitive GAL80.  
627 Bottom panels show an example of a transcription factor (*Dbx*) that is uniquely transcribed in  
628 GABAergic neurons. Y-axis represent log<sub>2</sub> ratios of Dam-Pol II over Dam-only.

629 **Figure 2. Correlation of RNA Pol II occupancy and chromatin accessibility for neurotransmitter**  
630 **subtypes.** (A) Correlation matrix for RNA Pol II signal (log<sub>2</sub> over Dam-only for all genes) and  
631 chromatin accessibility (CATaDa) for all gene loci (extended 5 kb upstream and 2 kb downstream). (B)  
632 Correlation matrix for RNA Pol II and chromatin accessibility at annotated transcription factor genes.  
633 (C) Characterisation of subtype-enriched genes at each developmental stage. Examples of enriched GO  
634 term categories for the remaining genes are also included.

635 **Figure 3. Transitions of uniquely enriched or depleted transcription factors during neural**  
636 **development.** Transcription factors uniquely enriched or depleted in cholinergic, GABAergic and  
637 glutamatergic neurons. A total of 86 transcription factors are identified across all stages.

638 **Figure 4. Absence of *Ets65A-RA/C/D/E* and *apterous* expression in cholinergic and GABAergic**  
639 **adult neurons, respectively.** (A) Pol II occupancy at *apterous* in the adult brain. Y-axis represent log<sub>2</sub>  
640 ratios of Dam-Pol II over Dam-only. (B) Expression pattern of *apterous* in the adult brain. (C) Pol II  
641 occupancy at *Ets65A* in the adult brain. Y-axis represent log<sub>2</sub> ratios of Dam-Pol II over Dam-only. (D)  
642 Expression pattern of *Ets65A-RA/C/D/E* in the adult brain.

643 **Figure 5. Evidence for predicted roles of identified transcription factors and their orthologues.**  
644 Strongly enriched or depleted transcription factors identified in developing larval brains. Uniquely  
645 enriched factors are predicted to be candidates that promote the respective neurotransmitter fate,  
646 whilst uniquely depleted factors are predicted to repress the neurotransmitter fate. A full tick  
647 indicates direct evidence that the transcription factor directly promotes or represses the  
648 neurotransmitter fate, whilst indirect, supporting evidence is indicated by faded tick in brackets. A  
649 question mark signifies that nothing is currently known, regarding neurotransmitter specification.

650 **Figure 6. Acj6 and Ets65A-PA co-bind both *ChAT* and a whole suite of genes involved in**  
651 **neuronal differentiation.** (A) Acj6 and Ets65-PA binding at ChAT (Y-axis represent log<sub>2</sub> ratios of  
652 Dam-Pol II over Dam-only). (B) Enriched GO term categories for Acj6 and Ets65A-PA bound genes. (C)-  
653 (E) Binding at *Ace*, *nAChRα4* and *hep*.



654 **References**

655

656 **Aguilar, J.I., Dunn, M., Mingote, S., Karam, C.S., Farino, Z.J., Sonders, M.S., Choi, S.J., Grygoruk, A.,**  
657 **Zhang, Y., Cela, C., Choi, B.J., Flores, J., Freyberg, R.J., McCabe, B.D., Mosharov, E.V., Krantz, D.E.,**  
658 **Javitch, J.A., Sulzer, D., Sames, D., Rayport, S., Freyberg, Z.,** (2017). Neuronal Depolarization Drives  
659 Increased Dopamine Synaptic Vesicle Loading via VGLUT. *Neuron* **95**, 1074-1088 e1077.

660 **Altun-Gultekin, Z., Andachi, Y., Tsalik, E.L., Pilgrim, D., Kohara, Y., Hobert, O.,** (2001). A regulatory  
661 cascade of three homeobox genes, *ceh-10*, *ttx-3* and *ceh-23*, controls cell fate specification of a defined  
662 interneuron class in *C. elegans*. *Development* **128**, 1951-1969.

663 **Andreae, L.C., Burrone, J.,** (2018). The role of spontaneous neurotransmission in synapse and circuit  
664 development. *J Neurosci Res* **96**, 354-359.

665 **Aughey, G.N., Cheetham, S.W., Southall, T.D.,** (2019). DamID as a versatile tool for understanding  
666 gene regulation. *Development* **146**.

667 **Aughey, G.N., Estacio Gomez, A., Thomson, J., Yin, H., Southall, T.D.,** (2018). CATaDa reveals global  
668 remodelling of chromatin accessibility during stem cell differentiation in vivo. *Elife* **7**.

669 **Beguin, S., Crepel, V., Aniksztejn, L., Becq, H., Pelosi, B., Pallesi-Pocachard, E., Bouamrane, L.,**  
670 **Pasqualetti, M., Kitamura, K., Cardoso, C., Represa, A.,** (2013). An epilepsy-related ARX polyalanine  
671 expansion modifies glutamatergic neurons excitability and morphology without affecting GABAergic  
672 neurons development. *Cereb Cortex* **23**, 1484-1494.

673 **Chang, S., Johnston, R.J., Jr., Frokjaer-Jensen, C., Lockery, S., Hobert, O.,** (2004). MicroRNAs act  
674 sequentially and asymmetrically to control chemosensory laterality in the nematode. *Nature* **430**, 785-  
675 789.

676 **Cheng, L., Arata, A., Mizuguchi, R., Qian, Y., Karunaratne, A., Gray, P.A., Arata, S., Shirasawa, S.,**  
677 **Bouchard, M., Luo, P., Chen, C.L., Busslinger, M., Goulding, M., Onimaru, H., Ma, Q.,** (2004). *Tlx3*  
678 and *Tlx1* are post-mitotic selector genes determining glutamatergic over GABAergic cell fates. *Nat*  
679 *Neurosci* **7**, 510-517.

680 **Coleman, B., Topalidou, I., Ailion, M.,** (2018). Modulation of Gq-Rho Signaling by the ERK MAPK  
681 Pathway Controls Locomotion in *Caenorhabditis elegans*. *Genetics* **209**, 523-535.

682 **Croset, V., Treiber, C.D., Waddell, S.,** (2018). Cellular diversity in the *Drosophila* midbrain revealed  
683 by single-cell transcriptomics. *Elife* **7**.

684 **Davie, K., Janssens, J., Koldere, D., De Waegeneer, M., Pech, U., Kreft, L., Aibar, S., Makhzami, S.,**  
685 **Christiaens, V., Bravo Gonzalez-Blas, C., Poovathingal, S., Hulselmans, G., Spanier, K.I., Moerman,**  
686 **T., Vanspauwen, B., Geurs, S., Voet, T., Lammertyn, J., Thienpont, B., Liu, S., Konstantinides, N.,**  
687 **Fiers, M., Verstreken, P., Aerts, S.,** (2018). A Single-Cell Transcriptome Atlas of the Aging *Drosophila*  
688 Brain. *Cell* **174**, 982-998 e920.

- 689 **Davis, F.P., Nern, A., Picard, S., Reiser, M.B., Rubin, G.M., Eddy, S.R., Henry, G.L.,** (2018). A genetic,  
690 genomic, and computational resource for exploring neural circuit function. *bioRxiv*, 385476.
- 691 **Diao, F., Ironfield, H., Luan, H., Diao, F., Shropshire, W.C., Ewer, J., Marr, E., Potter, C.J., Landgraf,**  
692 **M., White, B.H.,** (2015). Plug-and-play genetic access to drosophila cell types using exchangeable exon  
693 cassettes. *Cell Rep* **10**, 1410-1421.
- 694 **Duggan, A., Ma, C., Chalfie, M.,** (1998). Regulation of touch receptor differentiation by the  
695 *Caenorhabditis elegans* *mec-3* and *unc-86* genes. *Development* **125**, 4107-4119.
- 696 **Eade, K.T., Fancher, H.A., Ridyard, M.S., Allan, D.W.,** (2012). Developmental transcriptional  
697 networks are required to maintain neuronal subtype identity in the mature nervous system. *PLoS*  
698 *Genet* **8**, e1002501.
- 699 **Flames, N., Hobert, O.,** (2009). Gene regulatory logic of dopamine neuron differentiation. *Nature* **458**,  
700 885-889.
- 701 **Fogarty, M., Grist, M., Gelman, D., Marin, O., Pachnis, V., Kessaris, N.,** (2007). Spatial genetic  
702 patterning of the embryonic neuroepithelium generates GABAergic interneuron diversity in the adult  
703 cortex. *J Neurosci* **27**, 10935-10946.
- 704 **Goold, C.P., Davis, G.W.,** (2007). The BMP ligand *Gbb* gates the expression of synaptic homeostasis  
705 independent of synaptic growth control. *Neuron* **56**, 109-123.
- 706 **Gummalla, M., Maeda, R.K., Castro Alvarez, J.J., Gyurkovics, H., Singari, S., Edwards, K.A., Karch,**  
707 **F., Bender, W.,** (2012). *abd-A* regulation by the *iab-8* noncoding RNA. *PLoS Genet* **8**, e1002720.
- 708 **Hobert, O.,** (2008). Regulatory logic of neuronal diversity: terminal selector genes and selector motifs.  
709 *Proc Natl Acad Sci U S A* **105**, 20067-20071.
- 710 **Hobert, O.,** (2016). A map of terminal regulators of neuronal identity in *Caenorhabditis elegans*. *Wiley*  
711 *Interdiscip Rev Dev Biol* **5**, 474-498.
- 712 **Jin, Y., Hoskins, R., Horvitz, H.R.,** (1994). Control of type-D GABAergic neuron differentiation by *C.*  
713 *elegans* *UNC-30* homeodomain protein. *Nature* **372**, 780-783.
- 714 **Johnston, R.J., Jr., Hobert, O.,** (2005). A novel *C. elegans* zinc finger transcription factor, *lsy-2*,  
715 required for the cell type-specific expression of the *lsy-6* microRNA. *Development* **132**, 5451-5460.
- 716 **Kim, J., Inoue, K., Ishii, J., Vanti, W.B., Voronov, S.V., Murchison, E., Hannon, G., Abeliovich, A.,**  
717 (2007). A MicroRNA feedback circuit in midbrain dopamine neurons. *Science* **317**, 1220-1224.
- 718 **Kim, N.C., Marques, G.,** (2012). The *Ly6* neurotoxin-like molecule target of *wit* regulates spontaneous  
719 neurotransmitter release at the developing neuromuscular junction in *Drosophila*. *Dev Neurobiol* **72**,  
720 1541-1558.

- 721 **Konstantinides, N., Kapuralin, K., Fadil, C., Barboza, L., Satija, R., Desplan, C.,** (2018). Phenotypic  
722 Convergence: Distinct Transcription Factors Regulate Common Terminal Features. *Cell* **174**, 622-635  
723 e613.
- 724 **Kratsios, P., Stolfi, A., Levine, M., Hobert, O.,** (2011). Coordinated regulation of cholinergic motor  
725 neuron traits through a conserved terminal selector gene. *Nat Neurosci* **15**, 205-214.
- 726 **Lacin, H., Chen, H.M., Long, X., Singer, R.H., Lee, T., Truman, J.W.,** (2019). Neurotransmitter identity  
727 is acquired in a lineage-restricted manner in the Drosophila CNS. *Elife* **8**.
- 728 **Lacin, H., Zhu, Y., Wilson, B.A., Skeath, J.B.,** (2009). *dbx* mediates neuronal specification and  
729 differentiation through cross-repressive, lineage-specific interactions with *eve* and *hb9*. *Development*  
730 **136**, 3257-3266.
- 731 **Lai, S.L., Awasaki, T., Ito, K., Lee, T.,** (2008). Clonal analysis of Drosophila antennal lobe neurons:  
732 diverse neuronal architectures in the lateral neuroblast lineage. *Development* **135**, 2883-2893.
- 733 **Landgraf, M., Bossing, T., Technau, G.M., Bate, M.,** (1997). The origin, location, and projections of the  
734 embryonic abdominal motoneurons of Drosophila. *J Neurosci* **17**, 9642-9655.
- 735 **Lee, M.H., Salvaterra, P.M.,** (2002). Abnormal chemosensory jump 6 is a positive transcriptional  
736 regulator of the cholinergic gene locus in Drosophila olfactory neurons. *J Neurosci* **22**, 5291-5299.
- 737 **Luo, Y., Liu, S., Yao, K.,** (2017). Transcriptome-wide Investigation of mRNA/circRNA in miR-184 and  
738 Its r.57c > u Mutant Type Treatment of Human Lens Epithelial Cells. *Mol Ther Nucleic Acids* **7**, 71-80.
- 739 **Ma, K., Zheng, S., Zuo, Z.,** (2006). The transcription factor regulatory factor X1 increases the  
740 expression of neuronal glutamate transporter type 3. *J Biol Chem* **281**, 21250-21255.
- 741 **Marshall, O.J., Brand, A.H.,** (2015). *damidseq\_pipeline*: an automated pipeline for processing DamID  
742 sequencing datasets. *Bioinformatics* **31**, 3371-3373.
- 743 **Marshall, O.J., Southall, T.D., Cheetham, S.W., Brand, A.H.,** (2016). Cell-type-specific profiling of  
744 protein-DNA interactions without cell isolation using targeted DamID with next-generation  
745 sequencing. *Nat Protoc* **11**, 1586-1598.
- 746 **Mundorf, J., Donohoe, C.D., McClure, C.D., Southall, T.D., Uhlirova, M.,** (2019). *Ets21c* Governs  
747 Tissue Renewal, Stress Tolerance, and Aging in the Drosophila Intestine. *Cell Rep* **27**, 3019-3033  
748 e3015.
- 749 **Patel, T., Hobert, O.,** (2017). Coordinated control of terminal differentiation and restriction of cellular  
750 plasticity. *Elife* **6**.
- 751 **Picao-Osorio, J., Lago-Baldaia, I., Patraquim, P., Alonso, C.R.,** (2017). Pervasive Behavioral Effects  
752 of MicroRNA Regulation in Drosophila. *Genetics* **206**, 1535-1548.

- 753 **Pipes, G.C., Lin, Q., Riley, S.E., Goodman, C.S.**, (2001). The Beat generation: a multigene family  
754 encoding IgSF proteins related to the Beat axon guidance molecule in *Drosophila*. *Development* **128**,  
755 4545-4552.
- 756 **Schmid, A., Chiba, A., Doe, C.Q.**, (1999). Clonal analysis of *Drosophila* embryonic neuroblasts: neural  
757 cell types, axon projections and muscle targets. *Development* **126**, 4653-4689.
- 758 **Schuurmans, C., Armant, O., Nieto, M., Stenman, J.M., Britz, O., Klenin, N., Brown, C., Langevin,  
759 L.M., Seibt, J., Tang, H., Cunningham, J.M., Dyck, R., Walsh, C., Campbell, K., Polleux, F., Guillemot,  
760 F.**, (2004). Sequential phases of cortical specification involve Neurogenin-dependent and -independent  
761 pathways. *EMBO J* **23**, 2892-2902.
- 762 **Serrano-Saiz, E., Leyva-Diaz, E., De La Cruz, E., Hobert, O.**, (2018). BRN3-type POU Homeobox Genes  
763 Maintain the Identity of Mature Postmitotic Neurons in Nematodes and Mice. *Curr Biol* **28**, 2813-2823  
764 e2812.
- 765 **Serrano-Saiz, E., Poole, R.J., Felton, T., Zhang, F., De La Cruz, E.D., Hobert, O.**, (2013). Modular  
766 control of glutamatergic neuronal identity in *C. elegans* by distinct homeodomain proteins. *Cell* **155**,  
767 659-673.
- 768 **Soba, P., Zhu, S., Emoto, K., Younger, S., Yang, S.J., Yu, H.H., Lee, T., Jan, L.Y., Jan, Y.N.**, (2007).  
769 *Drosophila* sensory neurons require Dscam for dendritic self-avoidance and proper dendritic field  
770 organization. *Neuron* **54**, 403-416.
- 771 **Southall, T.D., Gold, K.S., Egger, B., Davidson, C.M., Caygill, E.E., Marshall, O.J., Brand, A.H.**, (2013).  
772 Cell-type-specific profiling of gene expression and chromatin binding without cell isolation: assaying  
773 RNA Pol II occupancy in neural stem cells. *Dev Cell* **26**, 101-112.
- 774 **Trudeau, L.E., El Mestikawy, S.**, (2018). Glutamate Cotransmission in Cholinergic, GABAergic and  
775 Monoamine Systems: Contrasts and Commonalities. *Front Neural Circuits* **12**, 113.
- 776 **van Steensel, B., Henikoff, S.**, (2000). Identification of in vivo DNA targets of chromatin proteins  
777 using tethered dam methyltransferase. *Nat Biotechnol* **18**, 424-428.
- 778 **Waite, M.R., Skidmore, J.M., Billi, A.C., Martin, J.F., Martin, D.M.**, (2011). GABAergic and  
779 glutamatergic identities of developing midbrain Pitx2 neurons. *Dev Dyn* **240**, 333-346.
- 780 **Wenick, A.S., Hobert, O.**, (2004). Genomic cis-regulatory architecture and trans-acting regulators of a  
781 single interneuron-specific gene battery in *C. elegans*. *Dev Cell* **6**, 757-770.
- 782 **Westmoreland, J.J., McEwen, J., Moore, B.A., Jin, Y., Condie, B.G.**, (2001). Conserved function of  
783 *Caenorhabditis elegans* UNC-30 and mouse Pitx2 in controlling GABAergic neuron differentiation. *J*  
784 *Neurosci* **21**, 6810-6819.
- 785 **Yaniv, S.P., Schuldiner, O.**, (2016). A fly's view of neuronal remodeling. *Wiley Interdiscip Rev Dev Biol*  
786 **5**, 618-635.

787 **Yu, G., Wang, L.G., Han, Y., He, Q.Y.,** (2012). clusterProfiler: an R package for comparing biological  
788 themes among gene clusters. *OMICS* **16**, 284-287.

789 **Zhang, F., Bhattacharya, A., Nelson, J.C., Abe, N., Gordon, P., Lloret-Fernandez, C., Maicas, M.,**  
790 **Flames, N., Mann, R.S., Colon-Ramos, D.A., Hobert, O.,** (2014). The LIM and POU homeobox genes  
791 *ttx-3* and *unc-86* act as terminal selectors in distinct cholinergic and serotonergic neuron types.  
792 *Development* **141**, 422-435.

793

794
